# Supplementary material
Source: PubMed Central journal article supplement (PMC9137328)
Supplement: NIHMS1678116-supplement-Supporting_info.pdf [file NIHMS1678116-supplement-Supporting_info.pdf]

**Modulation of Estrogen-Related Receptors Subtype Selectivity: Conversion of an ERR $\beta$ / $\gamma$   
Selective Agonist to ERR $\alpha$ / $\beta$ / $\gamma$  Pan Agonists**

Mohamed Shahien<sup>a</sup>, Mohamed Elagawany<sup>b,c,d</sup>, Sadichha Sitaula<sup>c</sup>, Shaimaa S. Goher<sup>a</sup>, Sheryl L. Burris<sup>c</sup>, Ryan Sanders<sup>c</sup>, Amer Avdagic<sup>c</sup>, Cyrielle Billon<sup>b,c</sup>, Lamees Hegazy<sup>b,c</sup>, Thomas P. Burris<sup>b,c</sup>, Bahaa Elgendy<sup>a,b,c,\*</sup>

<sup>a</sup>*Chemistry Department, Faculty of Science, Benha University, Benha 13518, Egypt*

<sup>b</sup>*Department of Pharmaceutical and Administrative Sciences, St. Louis College of Pharmacy, St. Louis, MO 63110, USA*

<sup>c</sup>*Center for Clinical Pharmacology, Washington University School of Medicine and St. Louis College of Pharmacy, St. Louis, MO 63110, USA*

<sup>d</sup>*Department of Pharmaceutical Chemistry, Faculty of Pharmacy, Damanshour University, Damanshour, Egypt*

**(E)-N'-Benzylidenebenzohydrazide (10) [1].**

Pale Yellow crystals; yield: 89% (EtOH). Mp 214-215 °C (Lit. mp 210-212 °C) [1]. LC/MS m/z: 225 [M+H<sup>+</sup>].

**(E)-N'-(4-(Dimethylamino)benzylidene)benzohydrazide (11)[2].**

Orange crystals; yield: 84% (EtOH). Mp 173-175 °C (Lit. mp 175-176 °C) [2]. LC/MS m/z: 268 [M+H<sup>+</sup>].

**(E)-N'-(4-Chlorobenzylidene)benzohydrazide (12)[3]**

White crystals; yield: 88% (EtOH). Mp 166-167 °C (Lit. mp 164-165 °C) [3]. LC/MS m/z: 259 [M+H<sup>+</sup>].

**(E)-N'-(2-Hydroxybenzylidene)benzohydrazide (13)[4]**

White crystals; yield: 69% (EtOH). Mp 160-162 °C (Lit. mp 163-164 °C)[4]. LC/MS m/z: 241 [M+H<sup>+</sup>].

**(E)-N'-(4-Hydroxybenzylidene)benzohydrazide (14)[5]**

Pale brown crystals; yield: 75% (EtOH). Mp 263-265 °C (Lit. mp 267-268 °C)[5]. LC/MS m/z: 241 [M+H<sup>+</sup>].

**(E)-N'-(4-Methoxybenzylidene)benzohydrazide (15)[6]**

White crystals; yield: 83% (EtOH). Mp 159-160 °C (Lit. mp 158 °C) [6]. LC/MS m/z: 255 [M+H<sup>+</sup>].

**(E)-N'-(3-Nitrobenzylidene)benzohydrazide (17)[6]**

Yellow crystals; yield: 86% (EtOH). Mp 189-190 °C (Lit. mp 188 °C)[6]. LC/MS m/z: 270 [M+H<sup>+</sup>].

**(E)-N'-(4-Nitrobenzylidene)benzohydrazide (18)[6]**

Yellow crystals; yield: 88% (EtOH). Mp 236-238 °C (Lit. mp 240-242 °C)[6]. LC/MS m/z: 270 [M+H<sup>+</sup>].

**(E)-N'-Benzylidene-2-hydroxybenzohydrazide (19)[7]**

White crystals; yield: 90% (EtOH). Mp 228-229 °C (Lit. mp 231 °C)[7]. LC/MS m/z: 241 [M+H<sup>+</sup>].

**(E)-N'-Benzylidene-4-chlorobenzohydrazide (20)[6]**

White crystals; yield: 87% (EtOH). Mp 226-228 °C (Lit. mp 230 °C)[6]. LC/MS m/z: 259 [M+H<sup>+</sup>].

**(E)-N'-Benzylidene-4-bromobenzohydrazide (21)[8]**

White crystals; yield: 81% (EtOH). Mp 236-238 °C (Lit. mp 235-237 °C)[8]. LC/MS m/z: 303 [M+H<sup>+</sup>].

**(E)-N'-Benzylidene-4-nitrobenzohydrazide (22)[9]**

Pale yellow crystals; yield: 81% (EtOH). Mp 254-256 °C (Lit. mp 259 °C)[9]. LC/MS m/z: 270 [M+H<sup>+</sup>].

**(E)-N'-Benzylidene-2-methylbenzohydrazide (23)**[10]

White crystals; yield: 77% (EtOH). Mp 169-171 °C (Lit. mp 173-174 °C)[10]. LC/MS m/z: 239 [M+H<sup>+</sup>].

**(E)-N'-(4-(Dimethylamino)benzylidene)-2-methylbenzohydrazide (25)**[11]

Yellow crystals; yield: 71% (EtOH). Mp 149-151 °C (Lit. mp 151-152 °C). LC/MS m/z: 282 [M+H<sup>+</sup>].

**(E)-4-Chloro-N'-(4-chlorobenzylidene)benzohydrazide (26)**[10]

White crystals; yield: 82% (EtOH). Mp 219-220 °C (Lit. mp 220-221 °C)[10]. LC/MS m/z: 293 [M+H<sup>+</sup>].

**(E)-2-Chloro-N'-(2-hydroxybenzylidene)benzohydrazide (28)**[12]

Yellow crystals; yield: 69% (EtOH). Mp 142-143 °C (Lit. mp 145 °C).[12] LC/MS m/z: 275 [M+H<sup>+</sup>].

**(E)-N'-(4-Hydroxybenzylidene)-2-methylbenzohydrazide (30)**[13]

Colorless microcrystals; yield: 72% (EtOH). Mp 155-157 °C. LC/MS m/z: 255 [M+H<sup>+</sup>].

**(E)-4-Chloro-N'-(2-hydroxybenzylidene)benzohydrazide (31)**[14]

Yellow crystals; yield: 76% (EtOH). Mp 236-238 °C (Lit. mp 240 °C)[14]. LC/MS m/z: 275 [M+H<sup>+</sup>].

**(E)-4-Bromo-N'-(2-hydroxybenzylidene)benzohydrazide (32)**[15]

Yellow crystals; yield: 79% (EtOH). Mp 249-251 °C. LC/MS m/z: 319 [M+H<sup>+</sup>].

**(E)-N'-Benzylidene-2-phenylacetohydrazide (34)**[16]

Colorless solid; yield: 58% (EtOH). Mp 151-153 °C (Lit. mp 154 °C). LC/MS m/z: 239 [M+H<sup>+</sup>].

**(E)-4-Nitro-N'-(4-nitrobenzylidene)benzohydrazide (36)**[17]

Orange yellow crystals; yield: 63% (EtOH). Mp 160-162 °C. LC/MS m/z: 315 [M+H<sup>+</sup>].

**(E)-4-Nitro-N'-(3-nitrobenzylidene)benzohydrazide (37)**[18]

Orange yellow crystals; yield: 63% (EtOH). Mp 189-190 °C. LC/MS m/z: 315 [M+H<sup>+</sup>].

**(E)-N'-Ethylidenebenzohydrazide (39)**[1]

Yellow crystals; yield: 75% (EtOH). Mp 154-156 °C (Lit. mp 159-162 °C)[1]. LC/MS m/z: 163 [M+H<sup>+</sup>].

159-162

**N'-((1E,2E)-3-Phenylallylidene)benzohydrazide (40)**[19]

Yellow crystals; yield: 53% (EtOH). Mp 186-189 °C (Lit. mp 192-194 °C)[19]. LC/MS m/z: 251 [M+H<sup>+</sup>].

***N'*-((1*E*,2*E*)-3-(4-(Dimethylamino)phenyl)allylidene)benzohydrazide (41)**[20]

Yellow solid; yield: 49% (EtOH). Mp 186-189 °C (Lit. mp 192-194 °C)[19]. LC/MS m/z: 294 [M+H<sup>+</sup>].

***(E)*-*N'*-(Furan-2-ylmethylene)benzohydrazide (43)**[21]

Yellow solid; yield: 83% (EtOH). Mp 129-130 °C (Lit. mp 133.8 °C)[21]. LC/MS m/z: 215 [M+H<sup>+</sup>].

***(E)*-*N'*-((5-Methylfuran-2-yl)methylene)benzohydrazide (44)**[21]

Yellow solid; yield: 85% (EtOH). Mp 122-123 °C. LC/MS m/z: 229 [M+H<sup>+</sup>].

***(E)*-*N'*-(Quinolin-2-ylmethylene)benzohydrazide (45)**[21]

Yellow solid; yield: 80% (EtOH). Mp 172-174 °C (Lit. mp 170 °C)[21]. LC/MS m/z: 276 [M+H<sup>+</sup>].

***(E)*-*N'*-(Quinolin-4-ylmethylene)benzohydrazide (46)**[21]

Yellow solid; yield: 84% (EtOH). Mp 214-216 °C (Lit. mp 218 °C)[22]. LC/MS m/z: 276 [M+H<sup>+</sup>].

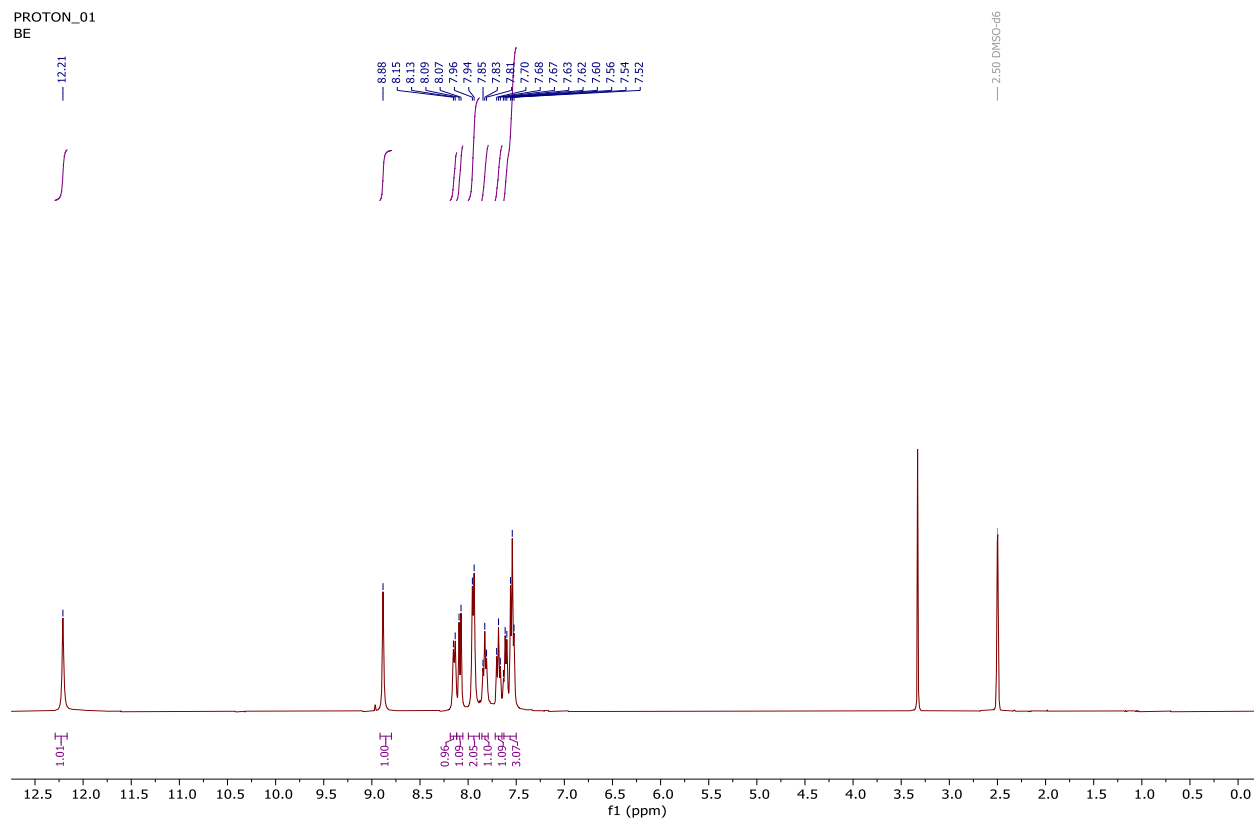

**Figure S1.**  $^1\text{H}$  NMR of compound **16**.

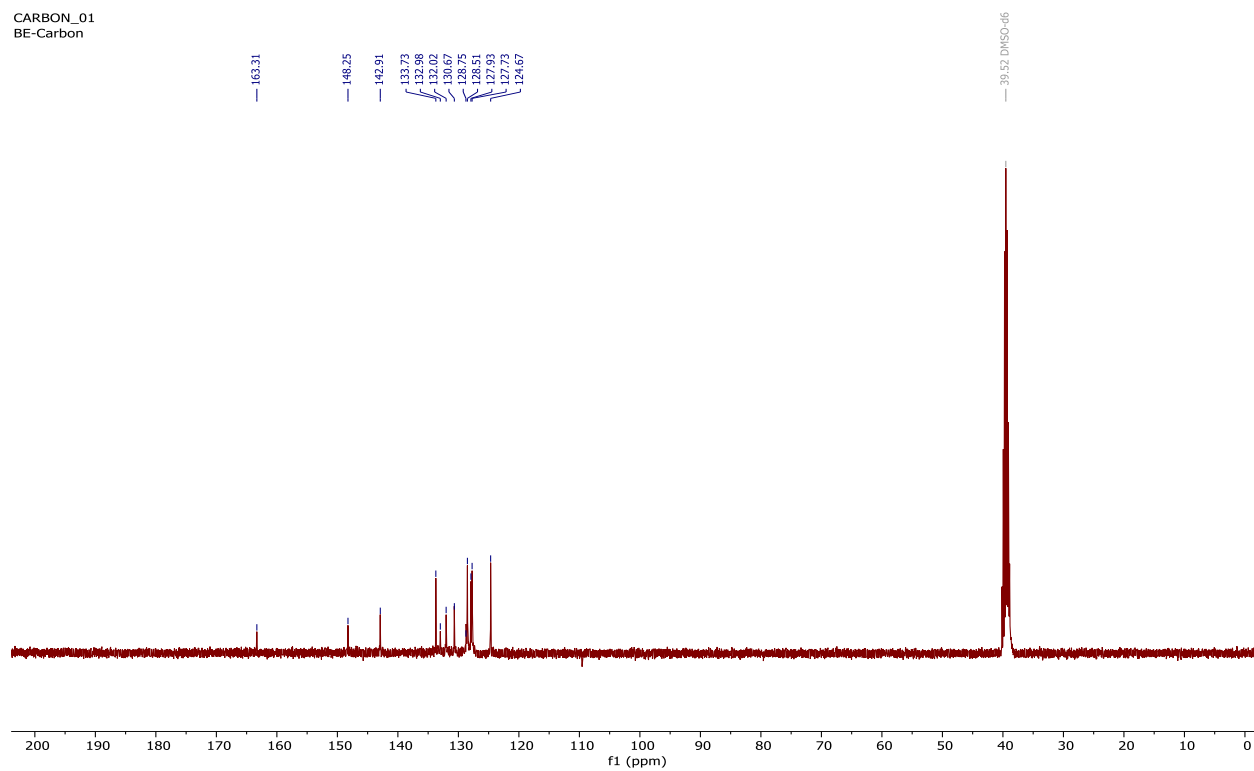

**Figure S2.**  $^{13}\text{C}$  NMR of compound **16**.

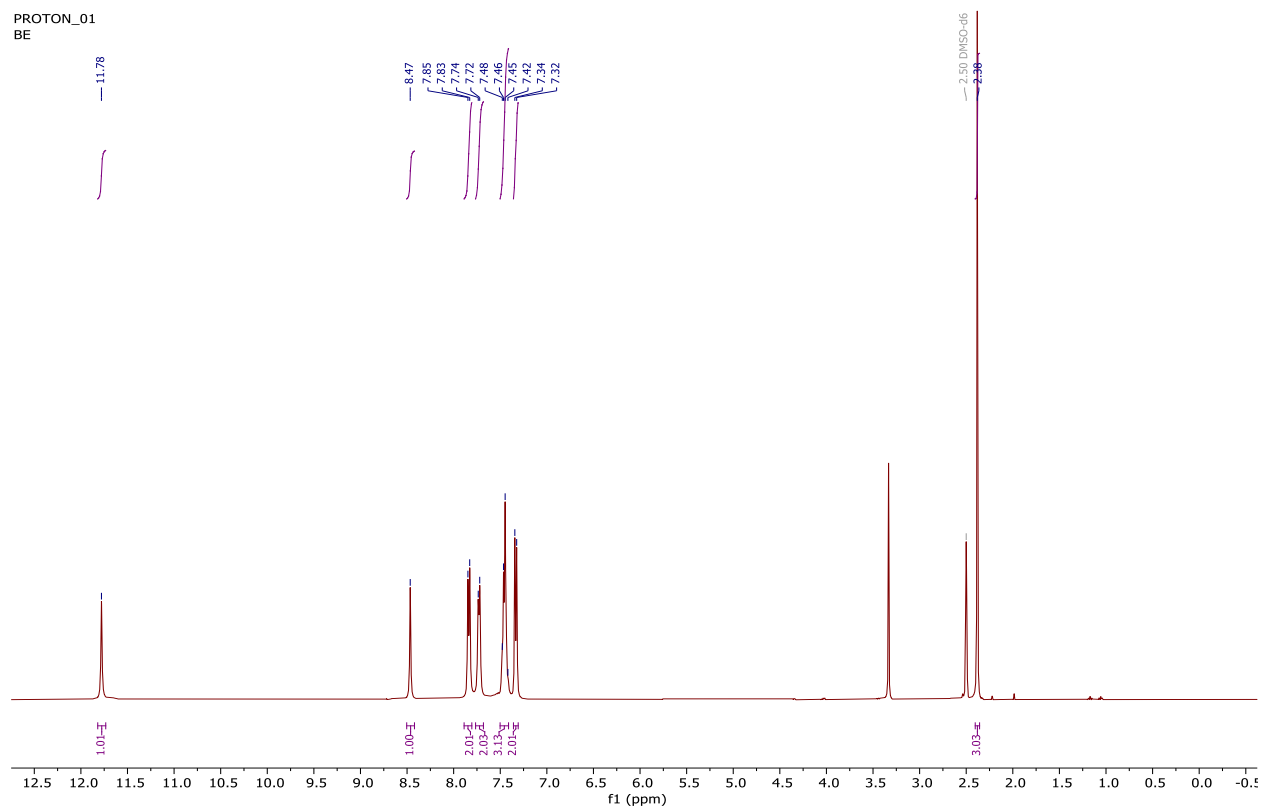

**Figure S3.**  $^1\text{H}$  NMR of compound **24**.

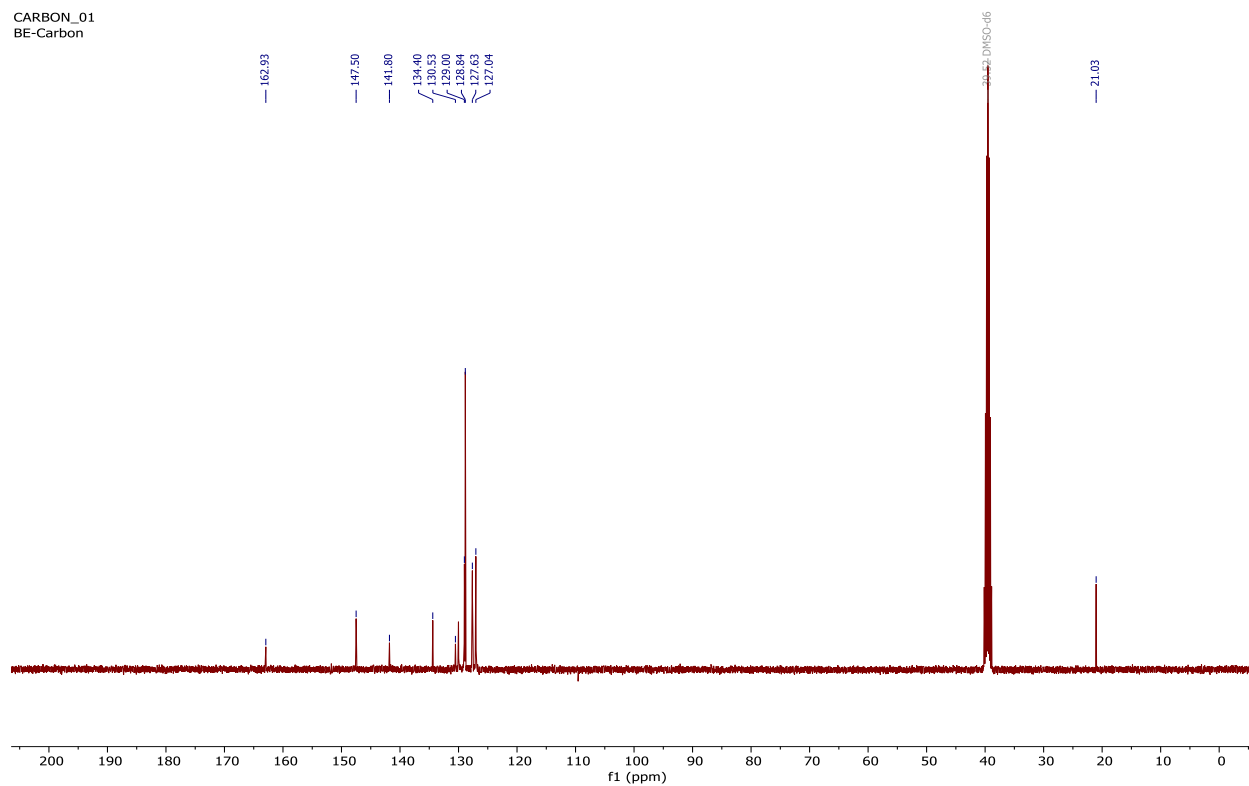

**Figure S4.**  $^{13}\text{C}$  NMR of compound **24**.

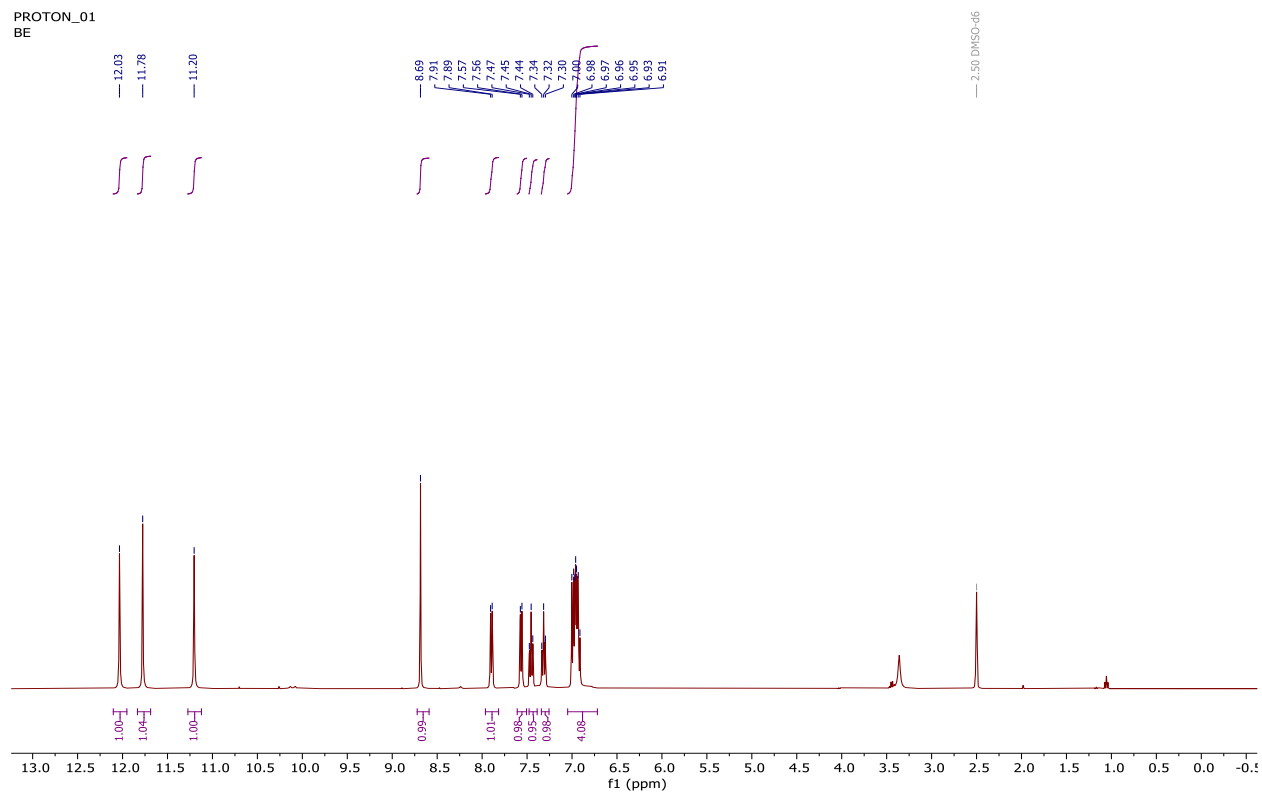

**Figure S5.**  $^1\text{H}$  NMR of compound **27**.

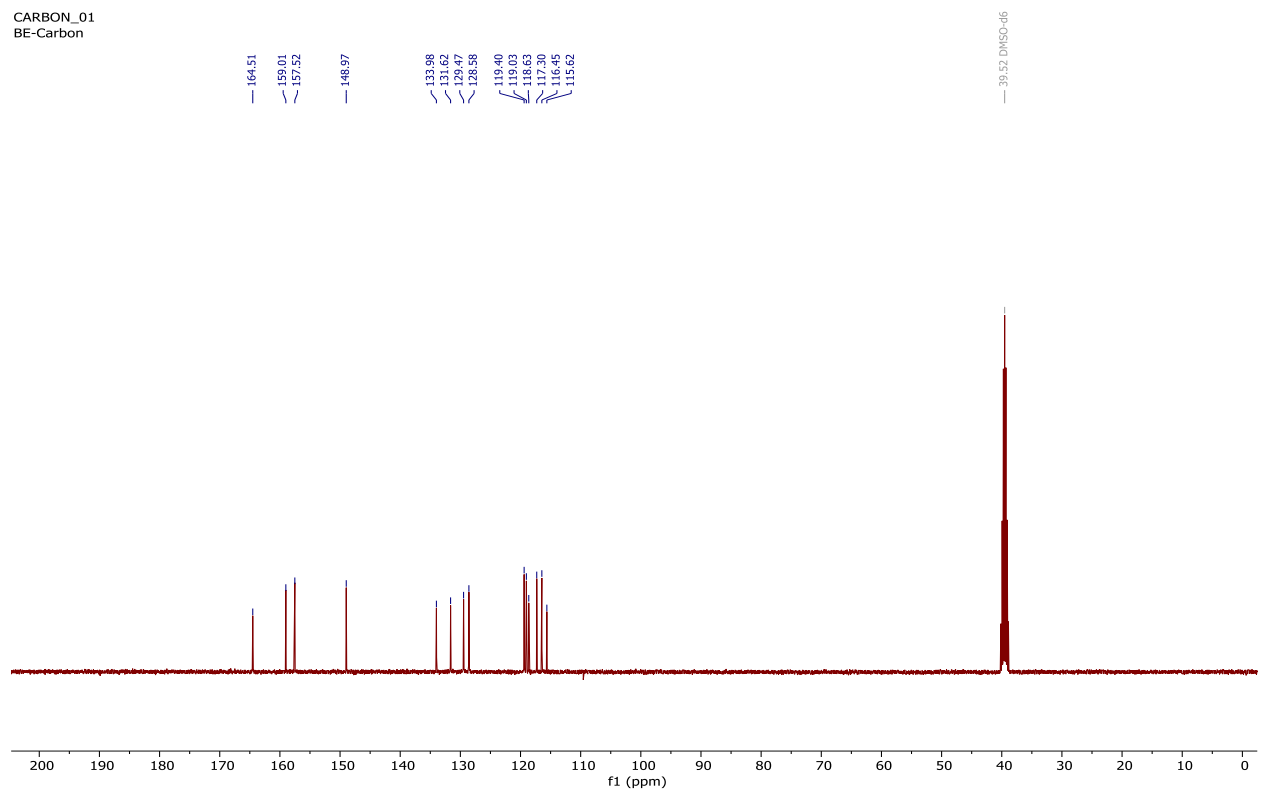

**Figure S6.**  $^{13}\text{C}$  NMR of compound **27**.

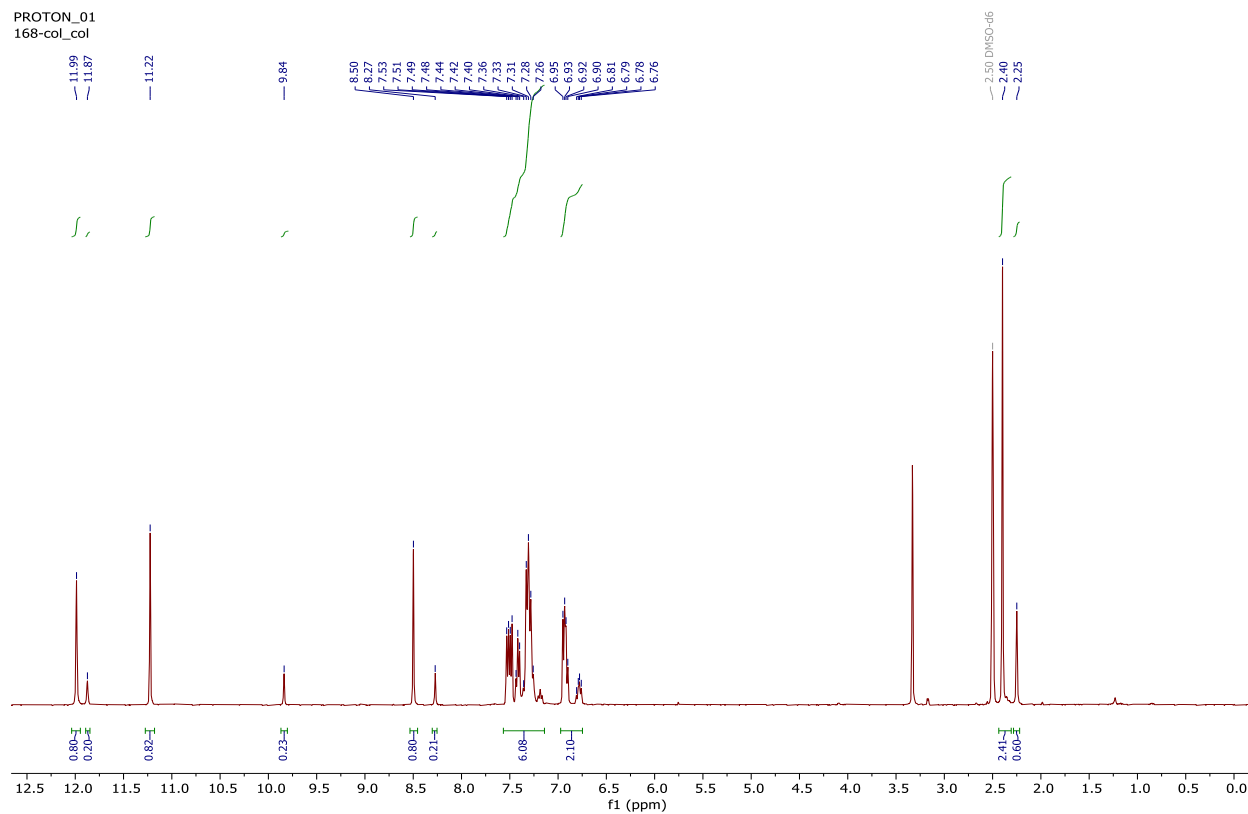

**Figure S7.**  $^1\text{H}$  NMR of compound **29**.

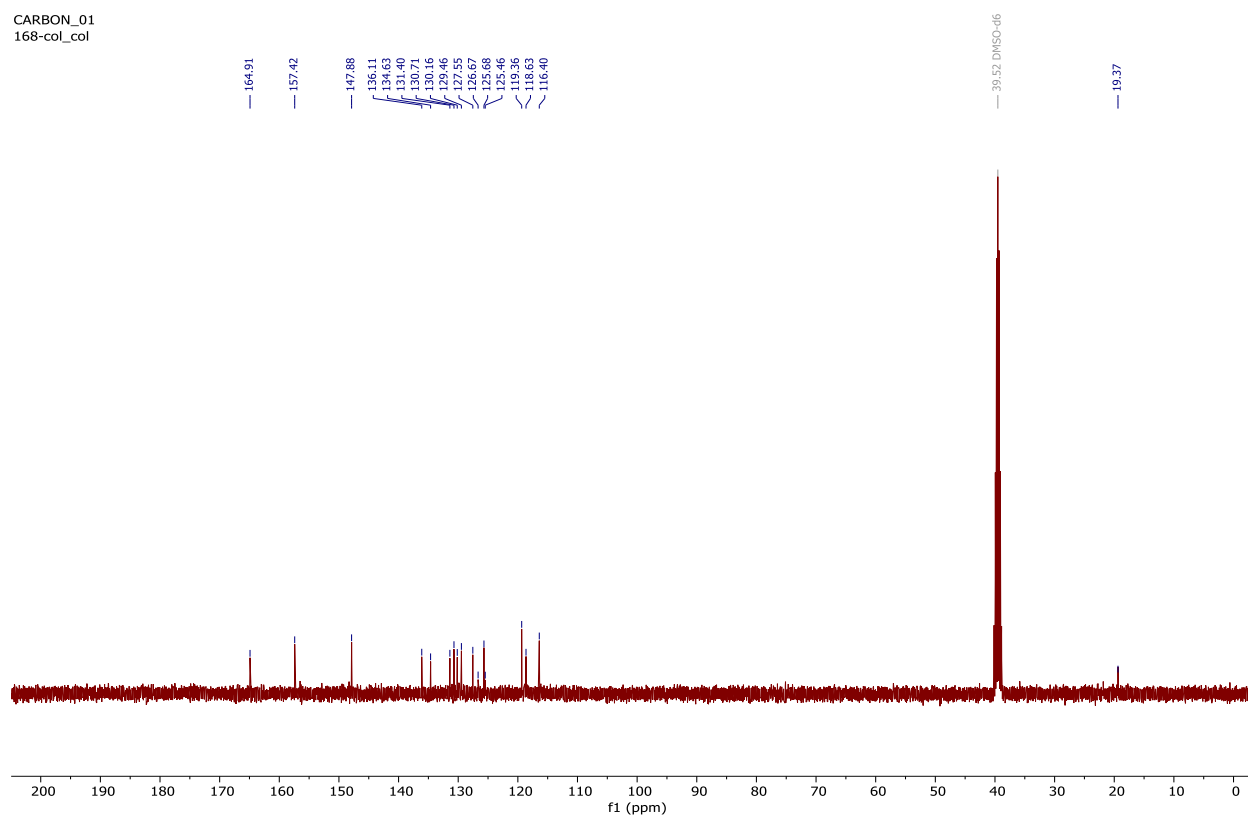

**Figure S8.**  $^{13}\text{C}$  NMR of compound **29**.



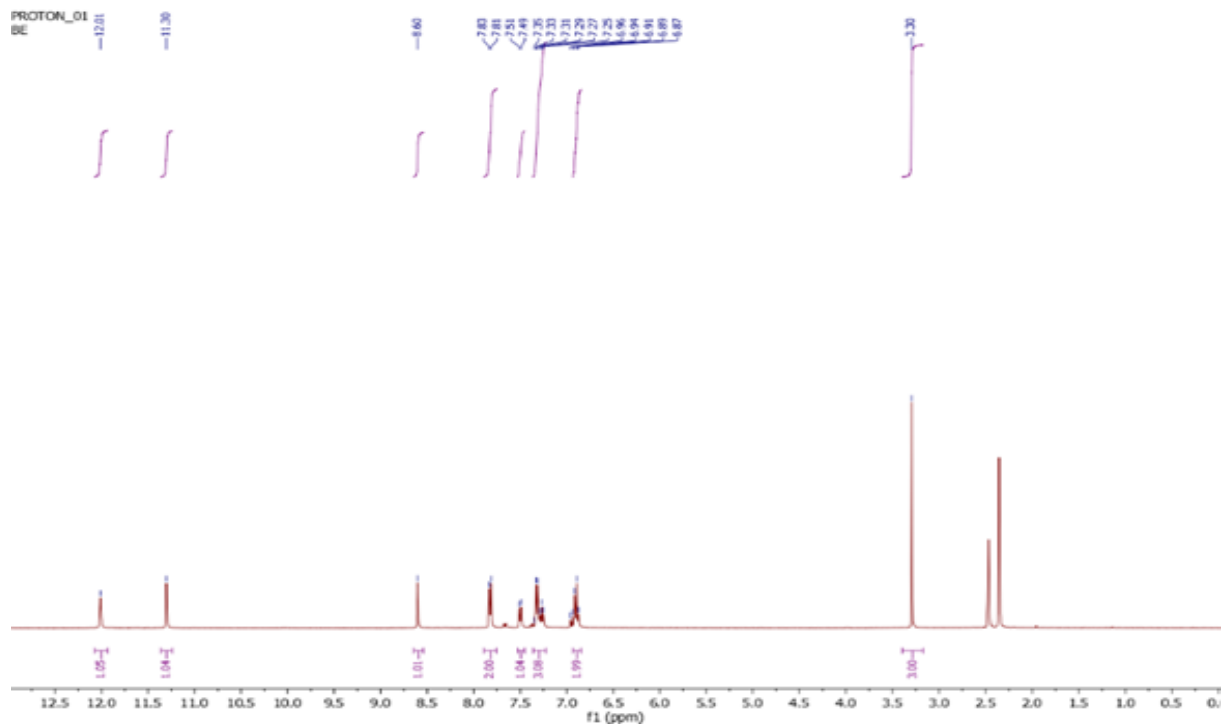

**Figure S9.**  $^1\text{H}$  NMR of compound **33**.

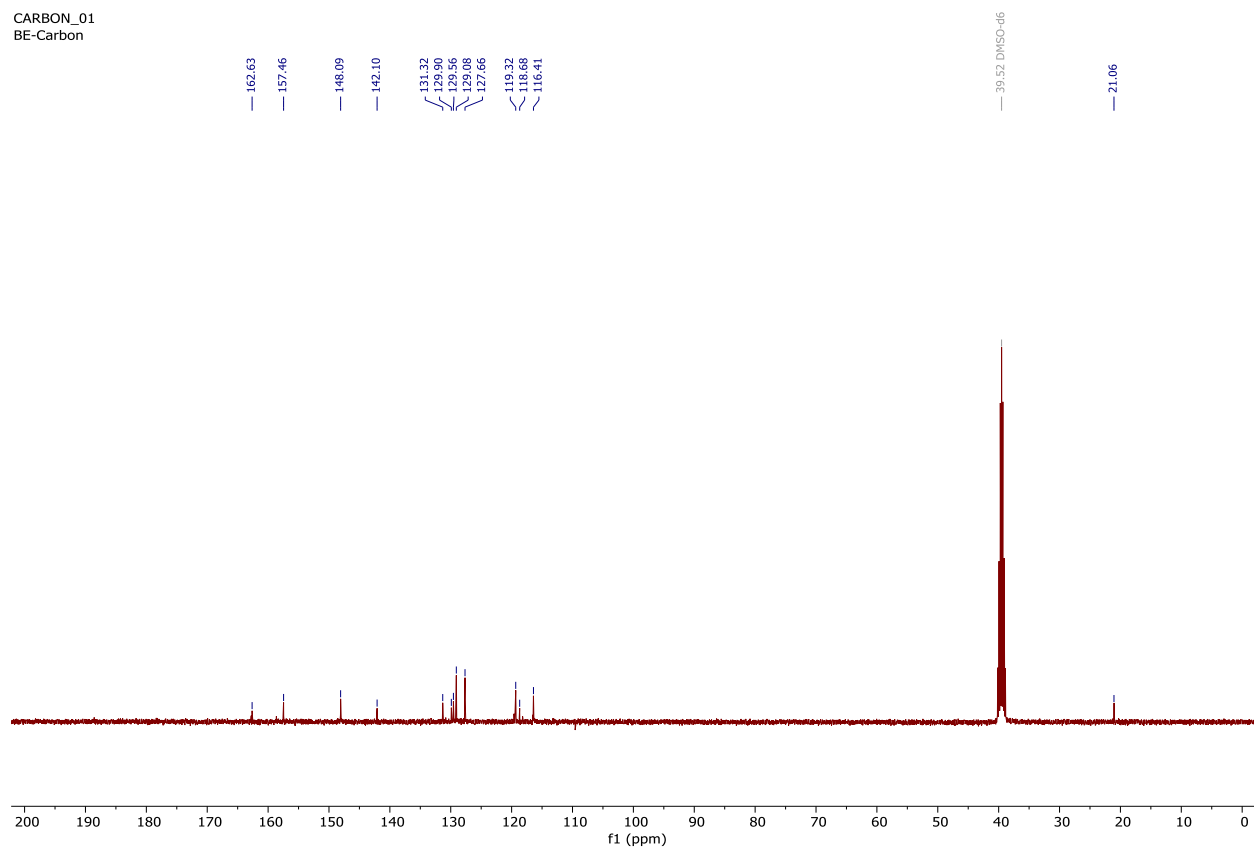

**Figure S10.**  $^{13}\text{C}$  NMR of compound **33**.

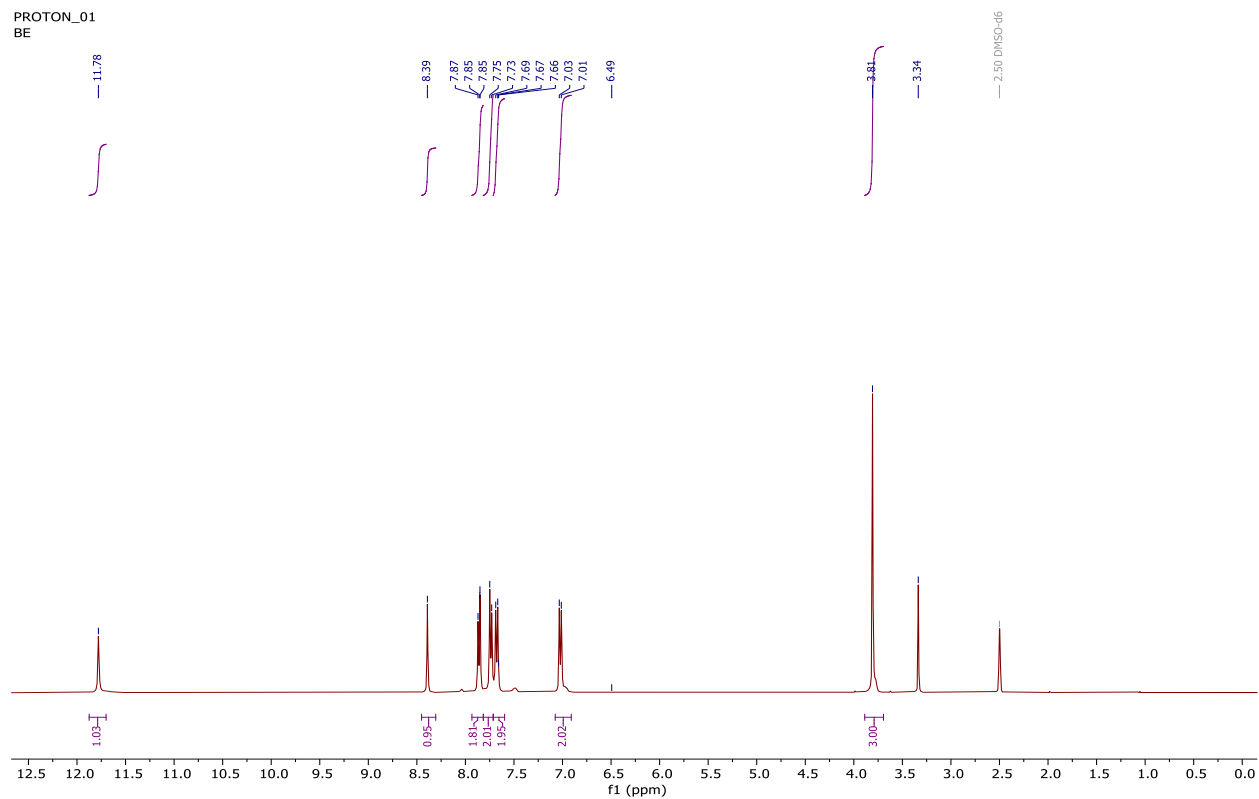

**Figure S11.**  $^1\text{H}$  NMR of compound **35**.

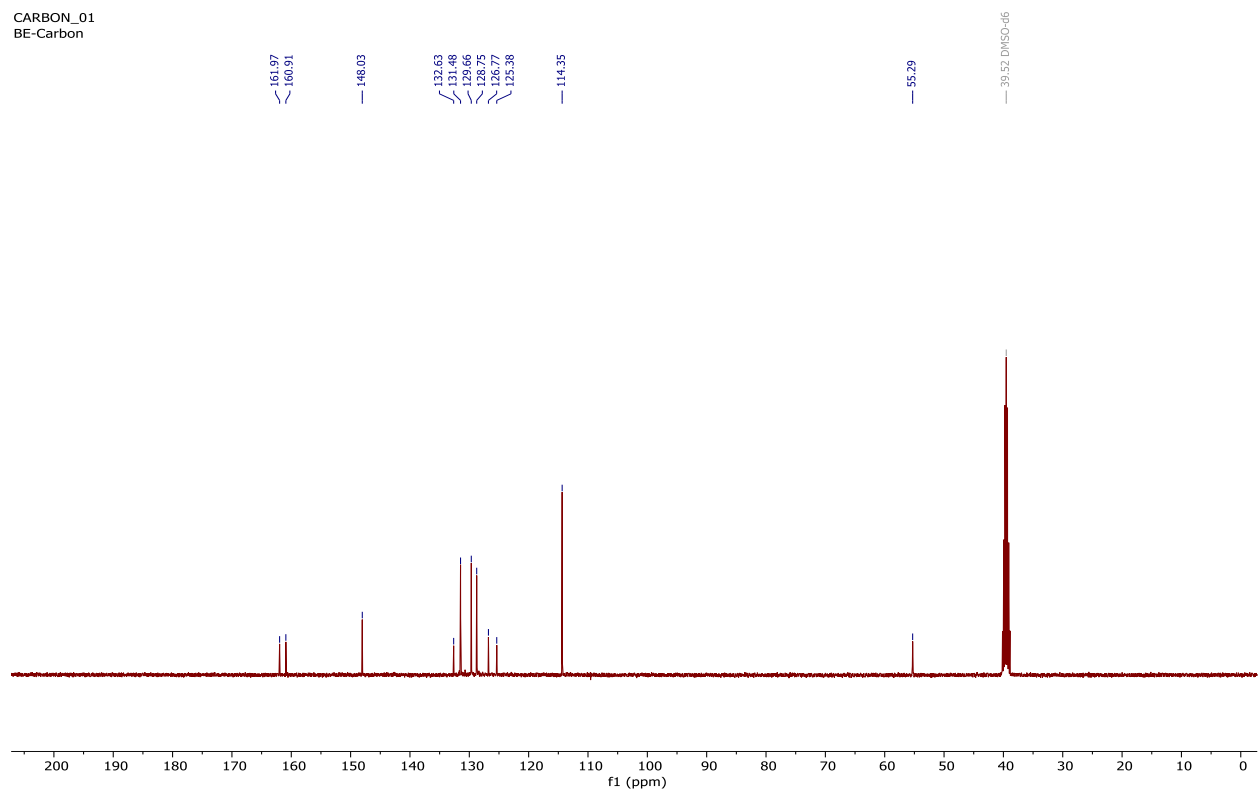

**Figure S12.**  $^{13}\text{C}$  NMR of compound **35**.

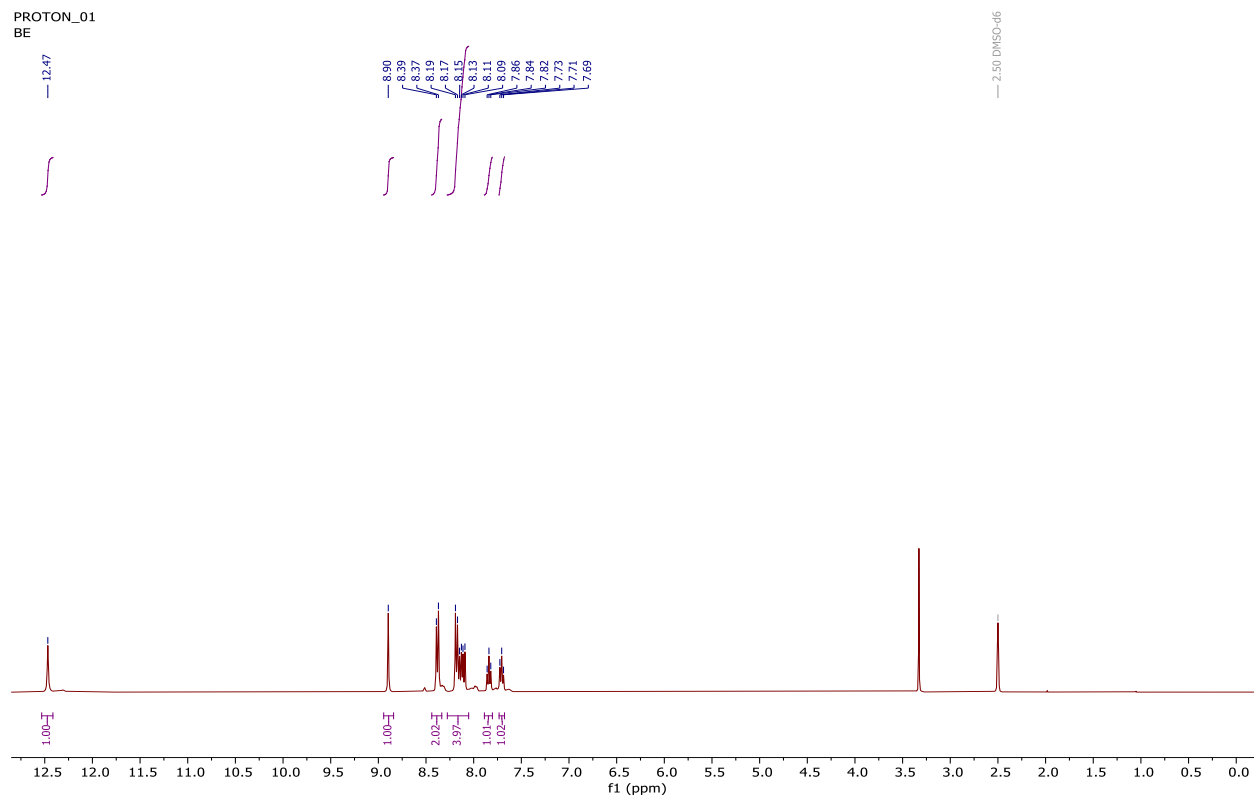

**Figure S13.**  $^1\text{H}$  NMR of compound **38**.

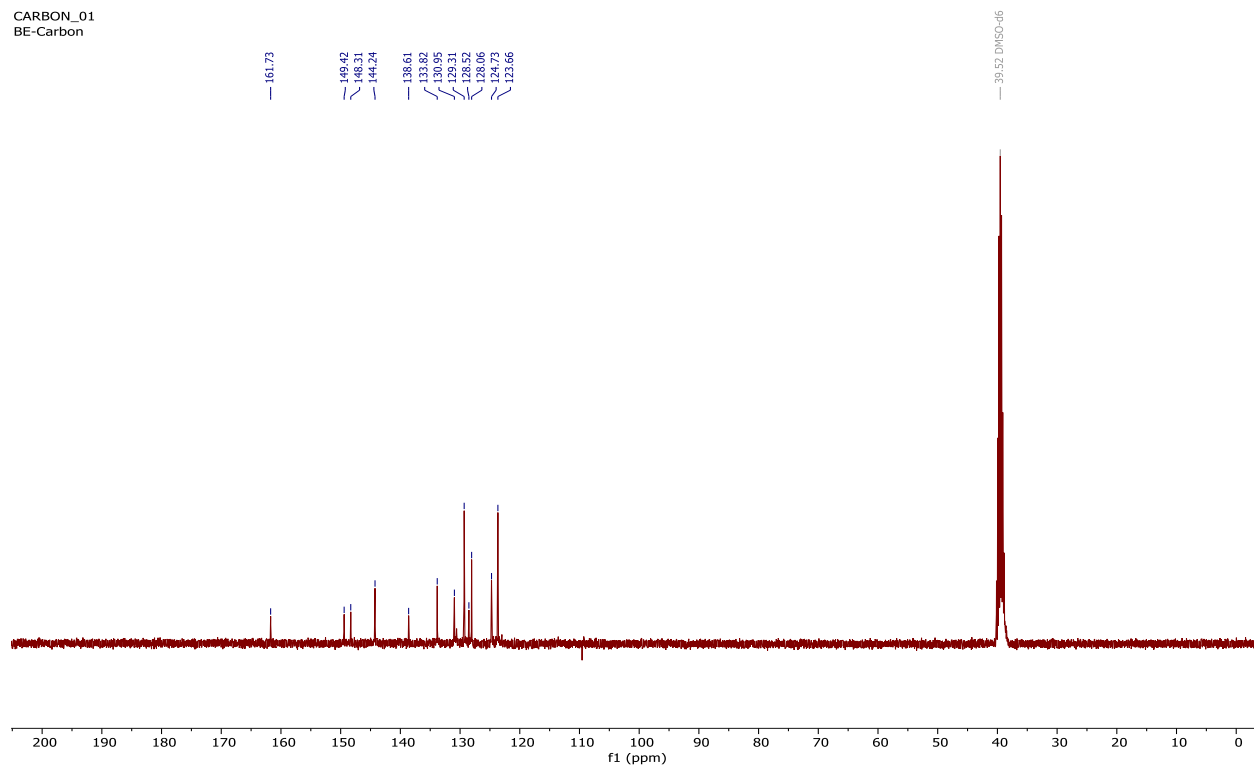

**Figure S14.**  $^{13}\text{C}$  NMR of compound **38**.

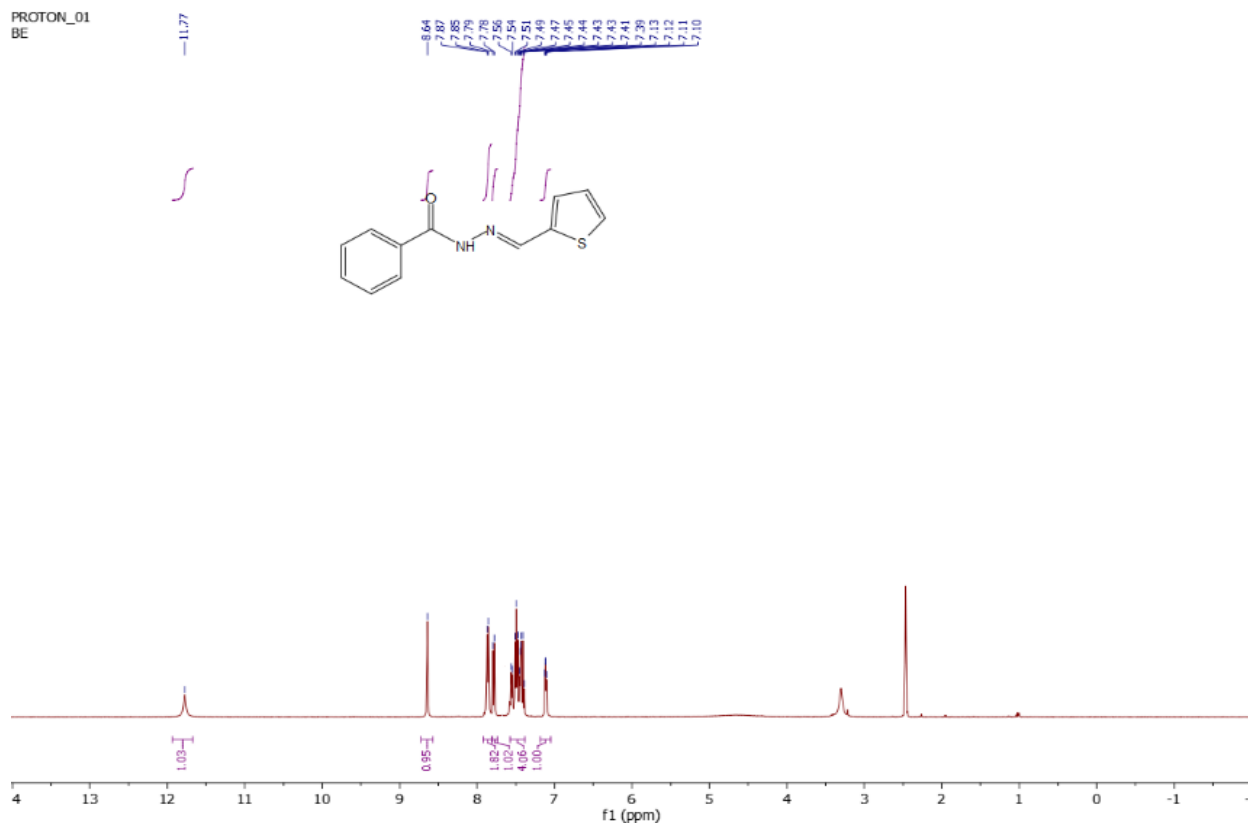

**Figure S15.**  $^1\text{H}$  NMR of compound **42**.

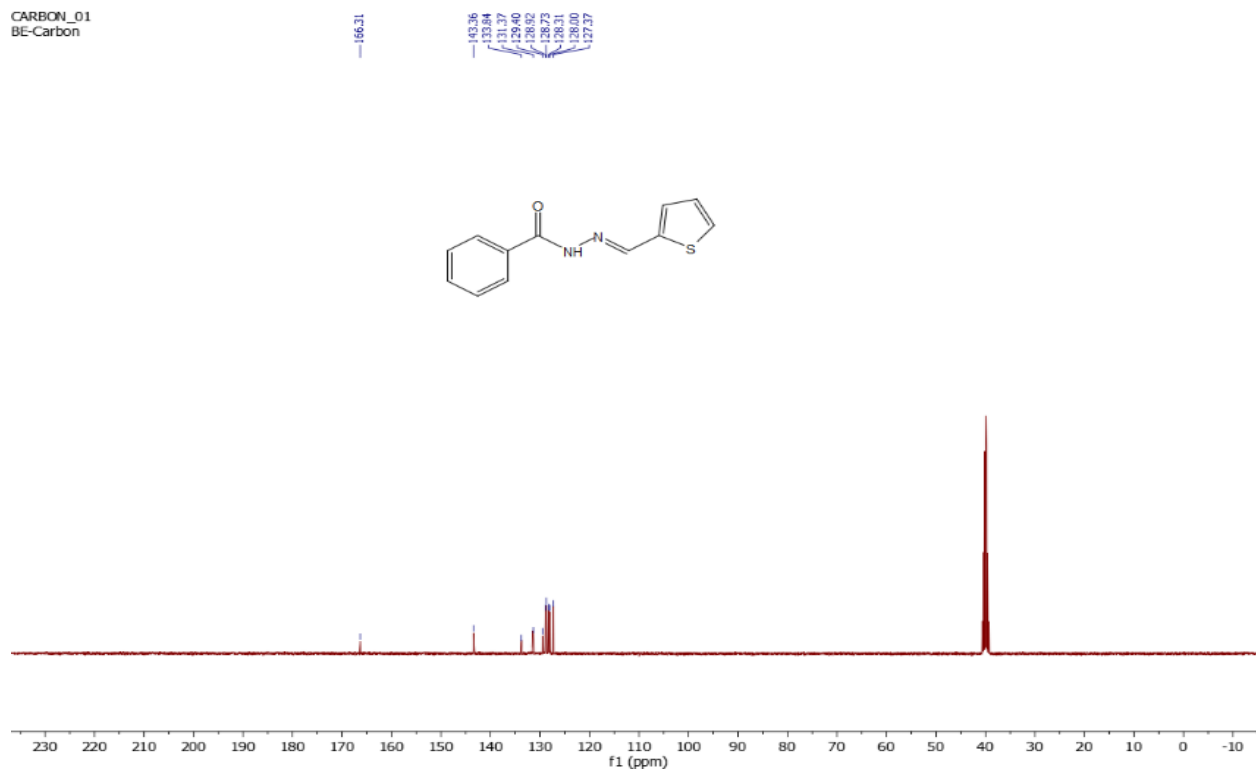

**Figure S16.**  $^{13}\text{C}$  NMR of compound **42**.

## References

- [1] J.B. Hendrickson, D.D. Sternbach, Mild oxidation of alkyl halides to aldehyde derivatives, *J. Org. Chem.* 40 (1975) 3450–3452. doi:10.1021/jo00911a036.
- [2] P.C. Lima, L.M. Lima, K.C.M. Da Silva, P.H.O. Léda, A.L.P. De Miranda, C.A.M. Fraga, E.J. Barreiro, Synthesis and analgesic activity of novel N-acylarylhydrazones and isomers, derived from natural safrole, *Eur. J. Med. Chem.* 35 (2000) 187–203. doi:10.1016/S0223-5234(00)00120-3.
- [3] B.M. Shabsoug, A. Al-Shyoukh, Synthesis and characterization of imine and hydrazone of 4-chlorobenzaldehyde, *Asian J. Chem.* 21 (2009) 4954–4956.
- [4] J.T. Edward, M. Gauthier, F.L. Chubb, P. Ponka, Synthesis of New Acylhydrazones as Iron-Chelating Compounds, *J. Chem. Eng. Data.* 33 (1988) 538–540. doi:10.1021/je00054a044.
- [5] M.S. Alam, D.U. Lee, Synthesis, biological evaluation, drug-likeness, and in silico screening of novel benzylidene-hydrazone analogues as small molecule anticancer agents, *Arch. Pharm. Res.* 39 (2016) 191–201. doi:10.1007/s12272-015-0699-z.
- [6] M. Dabiri, P. Salehi, M. Baghbanzadeh, M. Bahramnejad, A facile procedure for the one-pot synthesis of unsymmetrical 2,5-disubstituted 1,3,4-oxadiazoles, *Tetrahedron Lett.* 47 (2006) 6983–6986. doi:10.1016/j.tetlet.2006.07.127.
- [7] L. Wang, W. Qin, X. Tang, W. Dou, W. Liu, Development and Applications of Fluorescent Indicators for Mg<sup>2+</sup> and Zn<sup>2+</sup>, *J. Phys. Chem. A.* 115 (2011) 1609–1616. doi:10.1021/jp110305k.
- [8] P. Kumar, B. Narasimhan, K. Ramasamy, V. Mani, R. Mishra, A. Majeed, Synthesis, Antimicrobial, Anticancer Evaluation and QSAR Studies of 3/4-Bromo Benzohydrazide Derivatives, *Curr. Top. Med. Chem.* 15 (2015) 1050–1064. doi:10.2174/156802661511150408111252.
- [9] A.T. Dann, W. Davies, The reactions of nitrosulphonyl chlorides. Part I. The reaction of hydrazine hydrate with o-nitrosulphonyl chlorides, *J. Chem. Soc.* (1929) 1050–1055. doi:10.1039/jr9290001050.
- [10] P. Gao, Y. Wei, Efficient oxidative cyclization of N -acylhydrazones for the synthesis of 2,5-disubstituted 1,3,4-oxadiazoles using t-BuOI under neutral conditions, *Heterocycl. Commun.* 19 (2013) 113–119. doi:10.1515/hc-2012-0179.
- [11] V. Del Poeta, Maurizio; Mor, Anti-fungals targeting the synthesis of fungal shingolipids Abstract, WO 2016094307 A1 20160616, 2016.
- [12] J.C.S. Dutta, M. M.; Goswami, B. N.; Katakya, Studies on biologically active heterocycles. Part III. Synthesis and antibacterial activity of some 2-aryl/aralkyl-3-substituted-4-thiazolidinones, *J. Indian Chem. Soc.* 67 (1990) 332–334.
- [13] C.B. Tang, N'-(4-Hydroxybenzylidene)-2-methylbenzohydrazide, *Acta Crystallogr. Sect. E Struct. Reports Online.* 66 (2010) 0–5. doi:10.1107/S1600536810035063.
- [14] S. Bala, G. Uppal, S. Kamboj, V. Saini, D.N. Prasad, Design, characterization, computational studies, and pharmacological evaluation of substituted-N'-[(1E) substituted-phenylmethylidene] benzohydrazide analogs, *Med. Chem. Res.* 22 (2013) 2755–2767. doi:10.1007/s00044-012-0270-0.
- [15] A.M. Johnson, M.C. Young, X. Zhang, R.R. Julian, R.J. Hooley, Cooperative thermodynamic control of selectivity in the self-assembly of rare earth metal-ligand helices, *J. Am. Chem. Soc.* 135 (2013) 17723–17726. doi:10.1021/ja409882k.
- [16] L. Horner, H. Fernekess, Präparative Ergebnisse der Umsetzung von Hydrazinderivaten

- und Hydrazone mit Peressigsäure, *Chem. Ber.* 94 (1961) 712–724.  
doi:10.1002/cber.19610940320.
- [17] X. Han, X. Zhu, Z. Hong, L. Wei, Y. Ren, F. Wan, S. Zhu, H. Peng, L. Guo, L. Rao, L. Feng, J. Wan, Structure-Based Rational Design of Novel Inhibitors Against Fructose-1,6-Bisphosphate Aldolase from *Candida albicans*, *J. Chem. Inf. Model.* 57 (2017) 1426–1438. doi:10.1021/acs.jcim.6b00763.
- [18] X.Y. Li, (E)-4-Nitro-N'-(3-nitrobenzylidene)benzohydrazide, *Acta Crystallogr. Sect. E Struct. Reports Online.* 68 (2012). doi:10.1107/S1600536812004540.
- [19] G.M. Deng, Z. Chen, C.R. Wang, H.M. Zhang, (E)-N'-[(E)-3-Phenylallylidene]benzohydrazide, *Acta Crystallogr. Sect. E Struct. Reports Online.* 68 (2012) 3–8. doi:10.1107/S1600536811053645.
- [20] C. Kar, S. Samanta, S. Goswami, A. Ramesh, G. Das, A single probe to sense Al(iii) colorimetrically and Cd(ii) by turn-on fluorescence in physiological conditions and live cells, corroborated by X-ray crystallographic and theoretical studies, *Dalt. Trans.* 44 (2015) 4123–4132. doi:10.1039/c4dt01433b.
- [21] S.D. Rector, Douglas L.; Conder, George A.; Folz, Preparation of anthelmintic acylhydrazones, method of use and compositions, *PCT Int. Appl. WO 8706133 A1* 19871022., 1987.
- [22] P. Grammaticakis, Absorption in the middle ultraviolet and the visible of 2-formyl- and 4-formylquinoline and their nitrogenous functional derivatives, *Compt. Rend.* 248 (1959) 3719–3721.
